# Supplementary material for: Association between Weight-Adjusted Waist Index and All-Cause Mortality in Depressed Individuals: A Cohort Study Based on NHANES (2005-2018)
Source: Research Square preprint supplement (doi:10.21203/rs.3.rs-6626011/v1), 2025-05-22
Supplement: Supplementary file 1 [file acabf77525981ee797abe2f1.docx]

**Supplementary material**

**Supplemental material S1**

*Dealing with missing data*


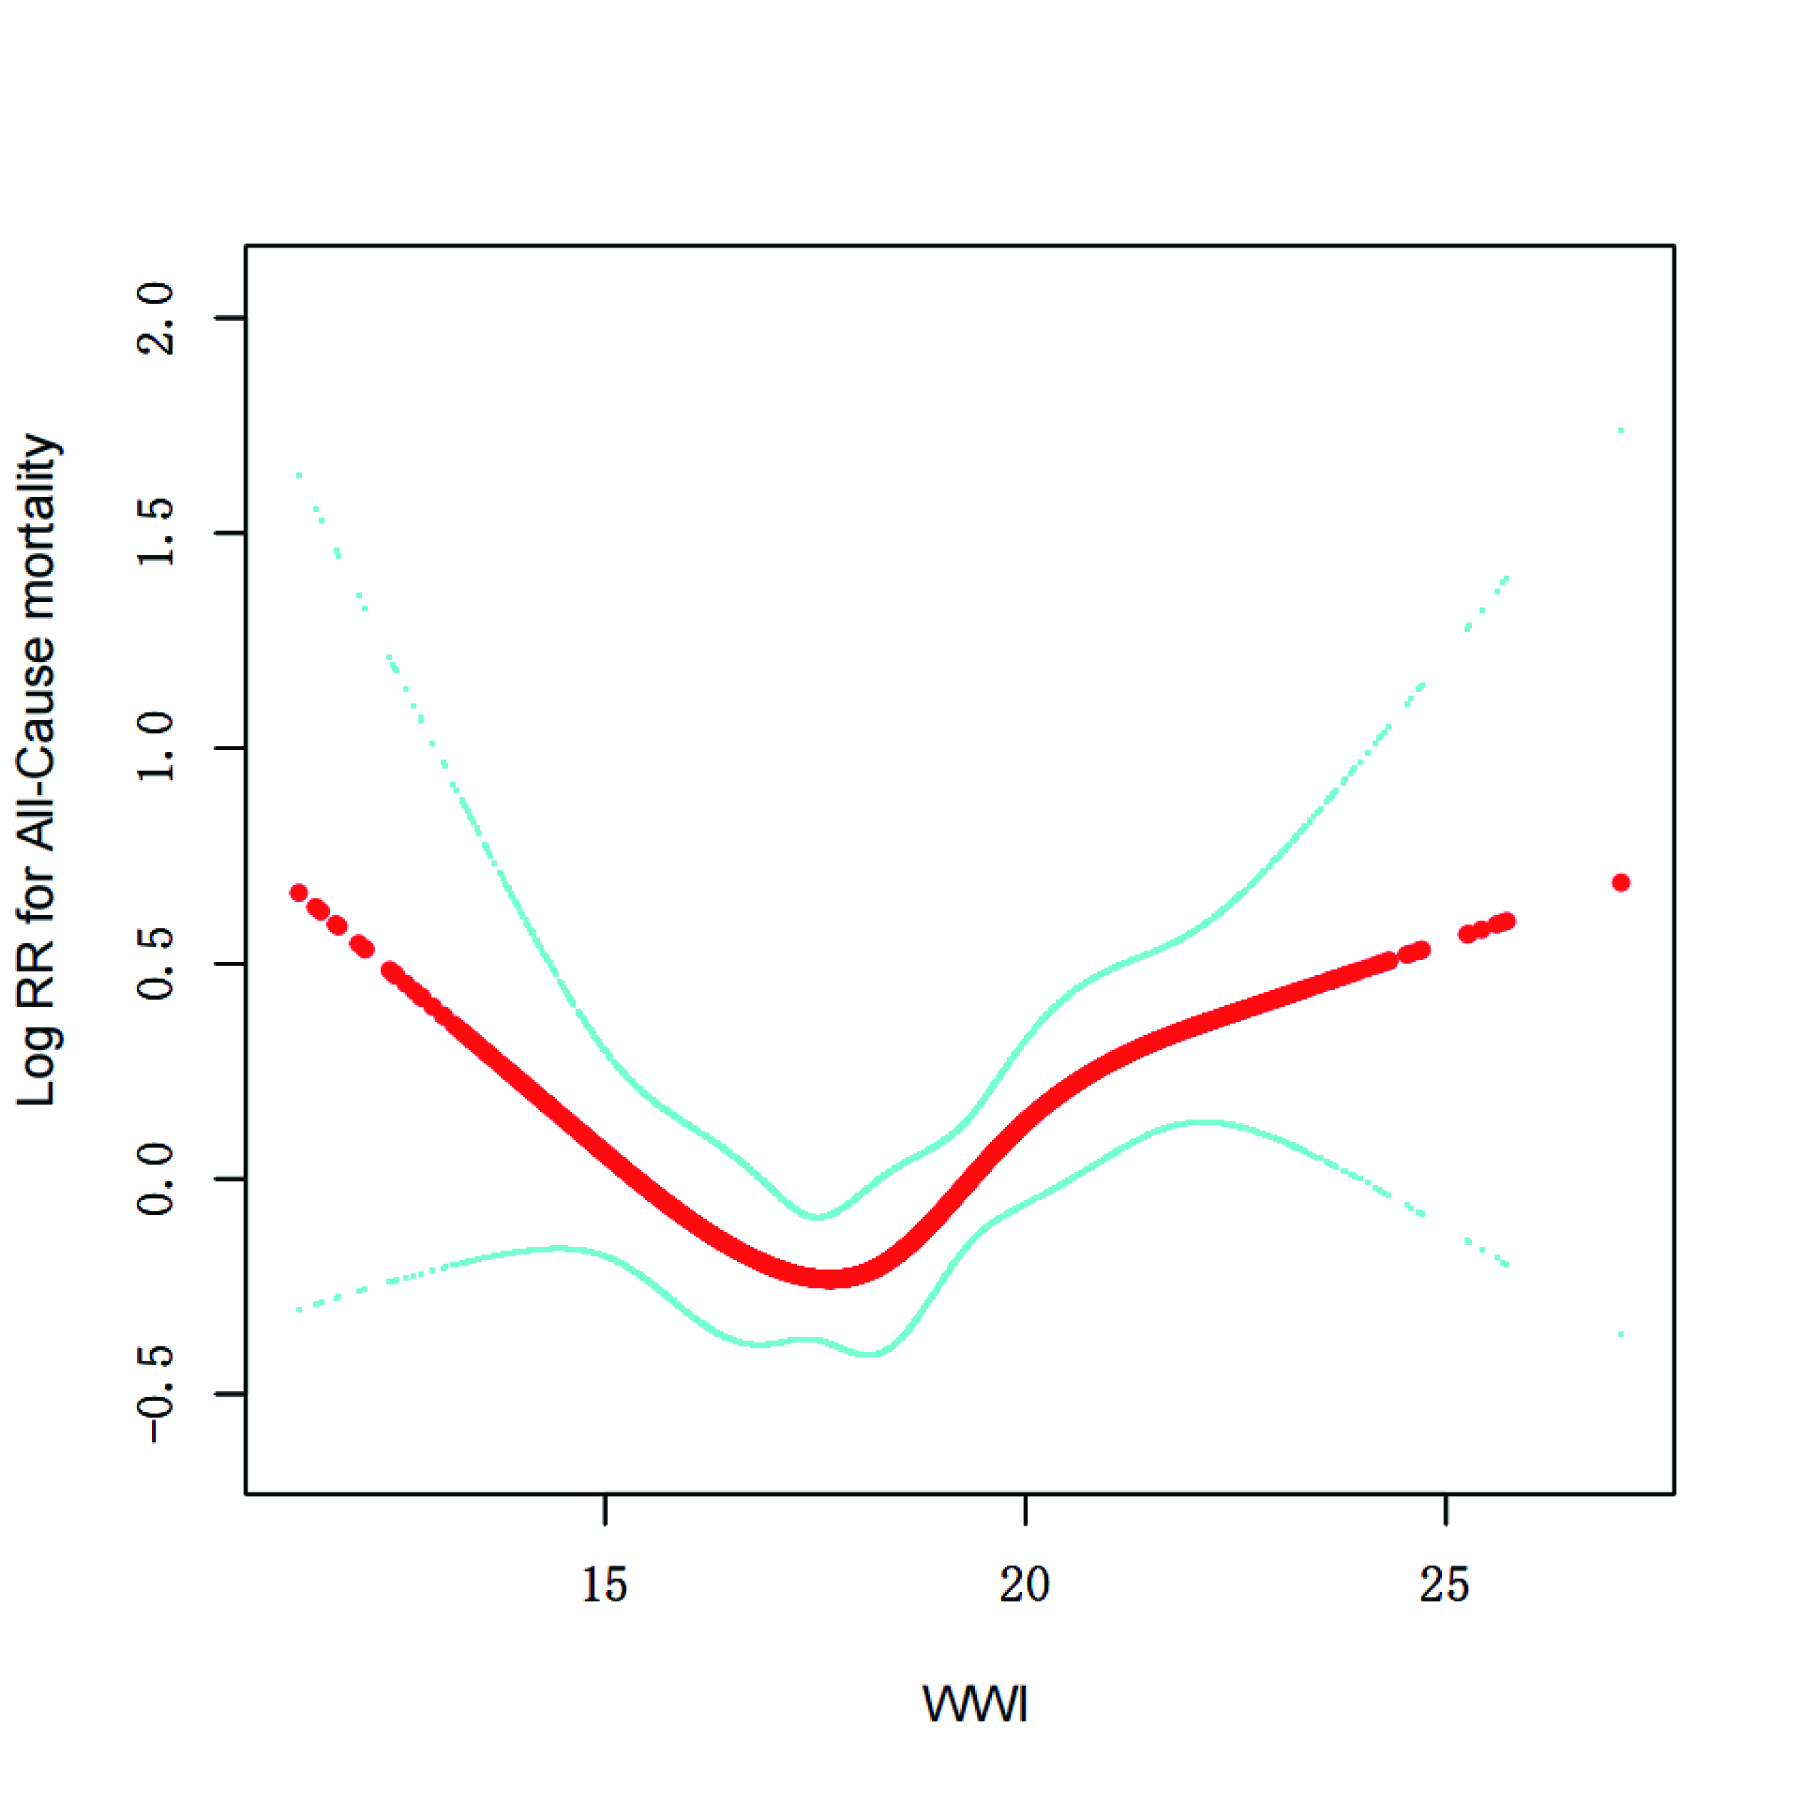


Table S1 shows the results of smooth curve fitting for variables with missing data, revealing a J - shaped association between WWI and all - cause mortality. The red solid line represents the smooth curve fitting of the relationship between variables, while the blue shaded area indicates the 95% confidence interval of the fitting. The model was adjusted for variables with missing data, including gender, age, race, physical activity, poverty - income ratio (PIR), hypertension, diabetes, coronary heart disease, cancer, and smoking and drinking.

**Table S1. Threshold Effect Analysis of the Weight-adjusted Index (WWI) in Relation to All-Cause Mortality and Cardiovascular Disease (CVD) Mortality**

|  | **With missing data** | | **Dealing with missing data** | |
| --- | --- | --- | --- | --- |
| All-cause mortality | CVD Death | All-cause mortality | CVD Death |
| Model I |  |  |  |  |
| A linear effect | 1.10 (1.04, 1.16) | 1.13 (1.02, 1.25) | 1.06 (1.00, 1.12) | 1.10 (0.99, 1.22) |
| Model II |  |  |  |  |
| Inflection point (cm/√kg) | 17.94 | 14.72 | 15.88 | 14.72 |
| WWI< Inflection point | 0.90 (0.81, 1.01) | 0.51 (0.29, 0.92) | 0.74 (0.59, 0.93) | 0.51 (0.28, 0.92) |
| WWI > Inflection point | 1.21 (1.13, 1.30) | 1.17 (1.06, 1.30) | 1.11 (1.04, 1.18) | 1.14 (1.03, 1.27) |
| Log - likelihood ratio test | <0.001 | 0.029 | 0.004 | 0.034 |

The model was adjusted for age, sex, race, physical activity, poverty-income ratio (PIR), hypertension, diabetes, coronary heart disease, cancer, and variables including smoking, alcohol consumption, and physical activity. CI represents the confidence interval; OR represents the odds ratio; *P < 0.05 indicates a significant difference between Model II and Model I.

**Missing data handling method**: Dummy variables were used to represent missing values of covariates, especially when the missing proportion of continuous variables exceeded 1%.

**Supplemental material S2**

Data with a follow-up time of less than 2 years were excluded.


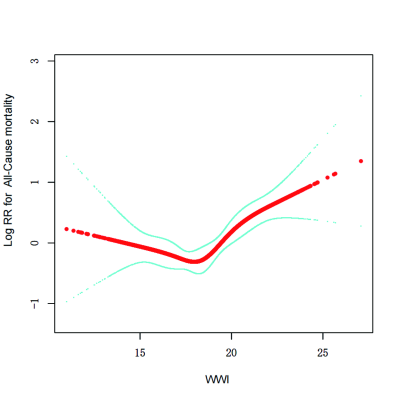


Table S2 shows the results of smooth curve fitting for variables with missing data, revealing a J - shaped association between WWI and all - cause mortality. The red solid line represents the smooth curve fitting of the relationship between variables, while the blue shaded area indicates the 95% confidence interval of the fitting. The model was adjusted for variables with missing data, including gender, age, race, physical activity, poverty - income ratio (PIR), hypertension, diabetes, coronary heart disease, cancer, and smoking and drinking.

**Table S2. Data with a follow-up time of less than 2 years were excluded.**

|  | **With missing data** | | **Dealing with missing data** | |
| --- | --- | --- | --- | --- |
| All-cause mortality | CVD Death | All-cause mortality | CVD Death |
| Model I |  |  |  |  |
| A linear effect | 1.10 (1.04, 1.16) | 1.13 (1.02, 1.25) | 1.12 (1.06, 1.19) | 1.15 (1.03, 1.28) |
| Model II |  |  |  |  |
| Inflection point (cm/√kg) | 17.94 | 14.72 | 18.3 | 17.89 |
| WWI< Inflection point | 0.90 (0.81, 1.01) | 0.51 (0.29, 0.92) | 0.94 (0.84, 1.05) | 0.93 (0.74, 1.17) |
| WWI > Inflection point | 1.21 (1.13, 1.30) | 1.17 (1.06, 1.30) | 1.26 (1.16, 1.37) | 1.28 (1.10, 1.49) |
| Log - likelihood ratio test | <0.001 | 0.029 | <0.001 | 0.057 |

The model was adjusted for age, sex, race, physical activity, poverty-income ratio (PIR), hypertension, diabetes, coronary heart disease, cancer, and variables including smoking, alcohol consumption, and physical activity. CI represents the confidence interval; OR represents the odds ratio; *P < 0.05 indicates a significant difference between Model II and Model I.
